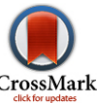

## Correction

# Correction: The Secreted Triose Phosphate Isomerase of *Brugia malayi* Is Required to Sustain Microfilaria Production *In Vivo*

The *PLOS Pathogens* Staff

### Notice of Republication

This article was republished on April 2, 2014, to correct Roman letters that were substituted for Greek letters in the Introduction, Results, Discussion, Materials and Methods, and Figure 2 Legend. Please download this article again to view the correct version. The originally published, uncorrected article and the republished, corrected article are provided here for reference.

### Supporting Information

**File S1.** Originally published, uncorrected article.

**File S2.** Republished, corrected article.

### Reference

1. Hewitson JP, Rückerl D, Harcus Y, Murray J, Webb LM, et al. (2014) The Secreted Triose Phosphate Isomerase of *Brugia malayi* Is Required to Sustain Microfilaria Production *In Vivo*. *PLoS Pathog* 10(2): e1003930.

**Citation:** The *PLOS Pathogens* Staff (2014) Correction: The Secreted Triose Phosphate Isomerase of *Brugia malayi* Is Required to Sustain Microfilaria Production *In Vivo*. *PLoS Pathog* 10(4): e1004133. doi:10.1371/journal.ppat.1004133

**Published** April 28, 2014

**Copyright:** © 2014 The *PLOS Pathogens* Staff. This is an open-access article distributed under the terms of the Creative Commons Attribution License, which permits unrestricted use, distribution, and reproduction in any medium, provided the original author and source are credited.
